# Supplementary material
Source: PubMed Central journal article supplement (PMC5766960)
Supplement: 10.1074_M117.805937_jbc.M117.805937-1.pdf [file 10.1074_M117.805937_jbc.M117.805937-1.pdf]

# SUPPLEMENTARY MATERIAL

## MicroRNA-302a suppresses influenza A virus-stimulated interferon regulatory factor-5 expression and cytokine storm induction

Xueyuan Chen<sup>1</sup>, Li Zhou<sup>2</sup>, Nanfang Peng<sup>1</sup>, Haisheng Yu<sup>1</sup>, Mengqi Li<sup>1</sup>, Zhongying Cao<sup>1</sup>, Yong Lin<sup>3</sup>, Xueyu Wang<sup>3</sup>, Qian Li<sup>3</sup>, Jun Wang<sup>5</sup>, Yinglong She<sup>1</sup>, Chengliang Zhu<sup>4</sup>, Mengji Lu<sup>3</sup>, Ying Zhu<sup>1</sup>, Shi Liu<sup>1,\*</sup>

<sup>1</sup> The State Key Laboratory of Virology, College of Life Sciences, Wuhan University, Wuhan 430072, China

<sup>2</sup> Animal Biosafety Level III Laboratory at the Center for Animal Experiment, School of Medicine, Wuhan University, Wuhan 430072, China

<sup>3</sup> Institute of Virology, University Hospital Essen, University of Duisburg-Essen, Essen 45122, Germany

<sup>4</sup> Department of Clinical Laboratory, Renmin Hospital of Wuhan University, Wuhan, Hubei 430060, China

<sup>5</sup> Center of clinical laboratory, The Fifth People's Hospital of Wuxi, Affiliated to Jiangnan University, Wuxi, Jiangsu 214005, China

### Supplemental Figure

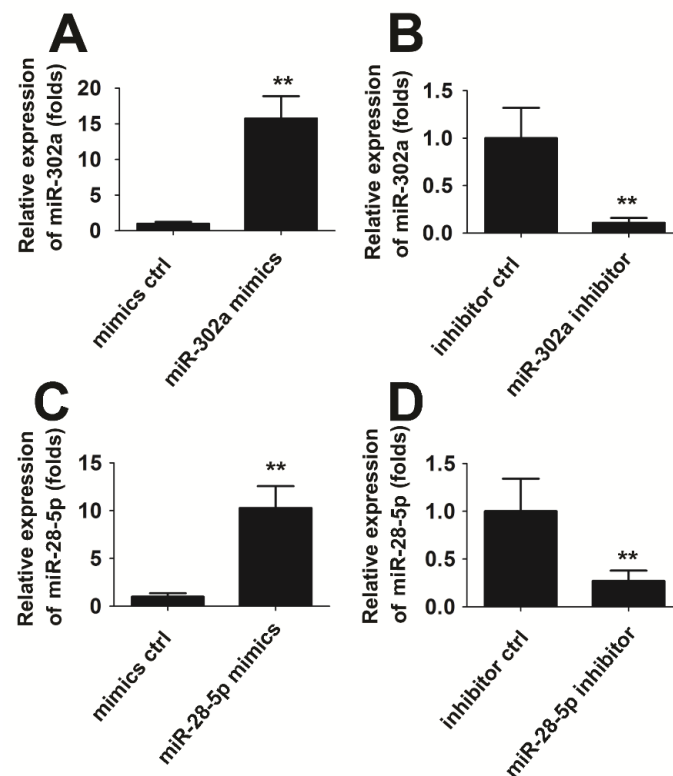

**Supplemental Figure 1. Determination of the efficiency of miRNA mimics and inhibitor.** (A) A549 cells were transfected with miRNA mimics control or miR-302a mimics for 48 h prior to real-time RT-PCR assays. (B) Experiments were performed as in A, except inhibitor control or miR-302a inhibitor were used. (C and D) Experiments were performed as described in A and B, except that miR-28-5p mimics or inhibitor was used. In the real-time RT-PCR experiments, the control was designated as 1. Bar graphs present means  $\pm$  SD, n=3 (\*\*P < 0.01; \*P < 0.05).

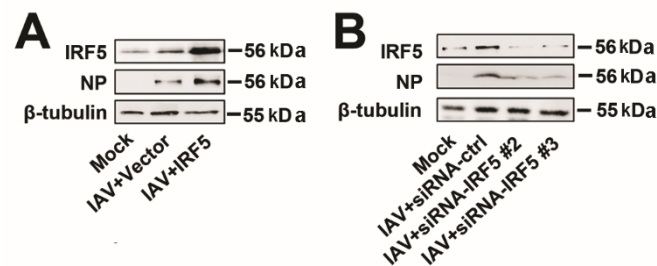

**Supplemental Figure 2. Determination of the efficiency of transfection and infection in Figure 3.** (A and B) Experiments were performed as in Fig 3 B and E except protein levels of IRF5 and NP were quantified using Western blot. All experiments were repeated at least three times with consistent results.

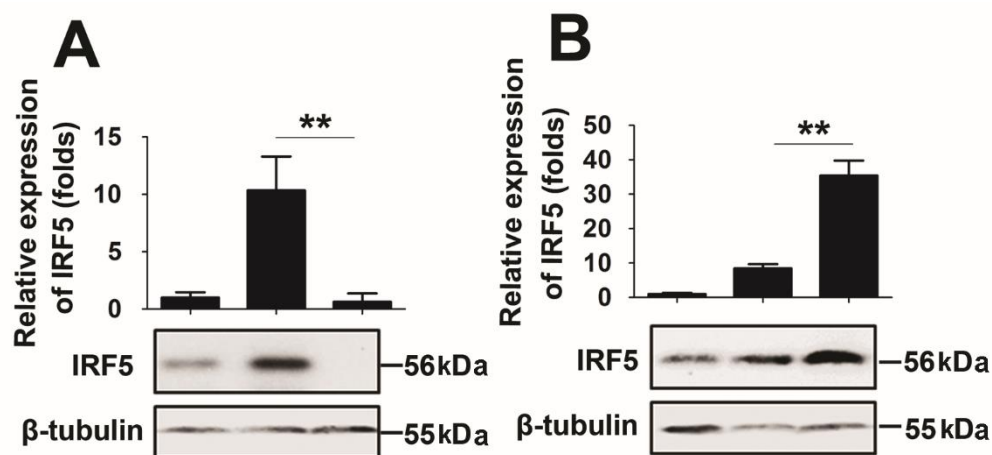

**Supplemental Figure 3. IAV induces IRF-5 expression via miR-302a in MLE-12 cells.** (A and B) Experiments were performed as described in Fig 5 A and B, except that MLE-12 cells were used. All experiments were repeated at least three times with consistent results. In the real-time RT-PCR experiments, the control was designated as 1. Bar graphs present means  $\pm$  SD, n=3 (\*\*P < 0.01; \*P < 0.05).

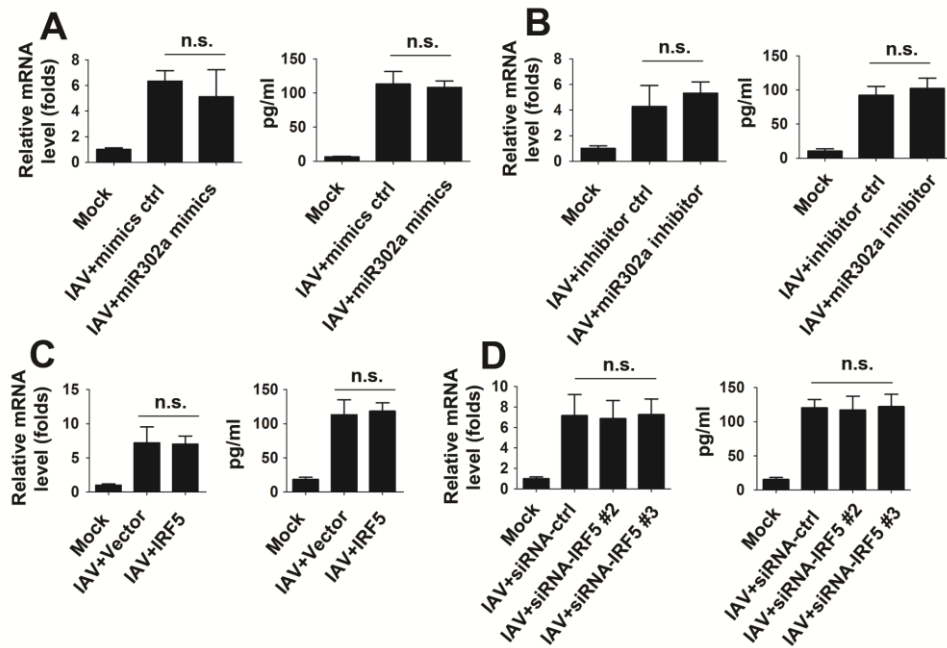

**Supplemental Figure 4. The role of miR-302a/IRF-5 axis in IAV-induced IFN $\alpha$  production.** Experiments were performed as in Fig 3, except the expression of IFN $\alpha$  was analyzed. All experiments were repeated at least three times with consistent results. Bar graphs present means  $\pm$  SD, n=3 (\*\*P < 0.01; \*P < 0.05), n.s., not significant.

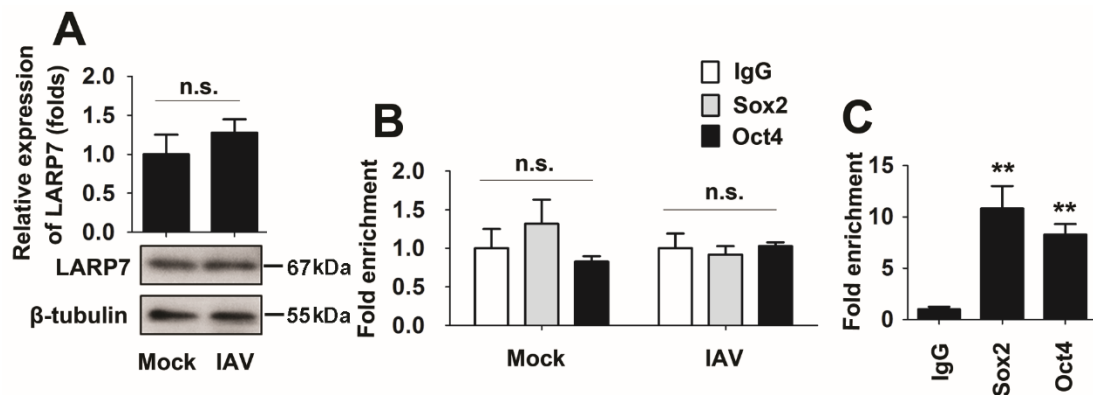

**Supplemental Figure 5. IAV infection did not regulate miR-302 expression at a transcriptional level.** (A) A549 cells infected with the WSN virus (MOI=1) or mock infected for 24 h prior to real-time RT-PCR (upper panel) and Western blot (lower panel) analyses. (B) A549 cells were infected with WSN virus (MOI=1) or mock infected for 24 h. ChIP assays were performed with anti-Sox2, -Oct4 or IgG-conjugated agarose. Promoter sequences in the input DNA and the DNA recovered from antibody-bound chromatin segments were detected using real-time RT-PCR. (C) Experiments were performed as in B, except hESCs were used. All experiments were repeated at least three times with consistent results. In the real-time RT-PCR experiments, the control was designated as 1. Bar graphs present means  $\pm$  SD, n=3 (\*\*P < 0.01; \*P < 0.05).

**Supplemental Table 1 Primers Used in Real-time RT-PCR.**

| Gene name                           | 5'primer                        | 3'primer                       |
|-------------------------------------|---------------------------------|--------------------------------|
| <b>IRF-5 (h)</b>                    | 5'-GCCATGAACCCAGTCCATCCCAGTG-3' | 5'-CCACGCCTTCGGTGTATTTCCCT-3'  |
| <b>IFN-<math>\beta</math> (h)</b>   | 5'-AAAGAAGCAGCAATTTTCAGC-3'     | 5'-CCTTGGCCTTCAGGTAATGCA-3'    |
| <b>TNF-<math>\alpha</math> (h)</b>  | 5'-CTTCTCGAACCCCGAGTGAC-3'      | 5'- ATGAGGTACAGGCCCTCTGA-3'    |
| <b>IL-6 (h)</b>                     | 5'-TGGTGGATGTTCCCCCGAG-3'       | 5'-TCCTGGGAATACTGGCACGG-3'     |
| <b>IL-8 (h)</b>                     | 5'-GGTGCAGTTTTGCCAAGGAG-3'      | 5'-TTCCTTGGGGTCCAGACAGA-3'     |
| <b>CCL2 (h)</b>                     | 5'-CTCATAGCAGCCACCTTCA-3'       | 5'-CACAGCTTCTTTGGGACAC-3'      |
| <b>CCL5 (h)</b>                     | 5'-CCCTCGCTGTCATCCTCAT-3'       | 5'-ACACTTGGCGGTTCTTTTCG-3'     |
| <b><math>\beta</math>-actin (h)</b> | 5'-GGACTTCGAGCAAGAGATGG-3'      | 5'-AGGAAGGAAGGCTGGAAGAG-3'     |
| <b>U6</b>                           | 5'-GCTTCGGCAGCACATATACTAAAAT-3' | 5'- CGCTTCACGAATTTGCGTGTCAT-3' |
| <b>miR-302a</b>                     | 5'- CGGGCATAAGTGCTTCCA-3'       | 5' -CAGTGCAGGGTCCGAGGT -3'     |
